# Supplementary material for: Localized cardiac metabolic trajectories and post-infectious metabolic sequelae in experimental Chagas disease
Source: Research Square preprint supplement (doi:10.21203/rs.3.rs-2497474/v1), 2023-01-20
Supplement: Supplementary file 1 [file 8425d774aeb9eddfd4abd9e8.pdf]

**Supplementary file 1. PCoA distances between naïve, infected and treatment groups.**

We performed detailed distance analysis between infected and uninfected samples (Tables A and B, Figure A), and between treatment groups (all experimental samples included, Table C-E, Figure B, Figure C). To control for any possible confounding effects from the one outlier with high parasite burden post-BNZ treatment, we also performed the same analysis, excluding that mouse (Tables F-H, Figure D, Figure E).

**Table A. Distance analysis between naïve and infected at 50, 75, and 142 days post infection (DPI).**

|           | DPI | pseudo-F | p-value | q-value |
|-----------|-----|----------|---------|---------|
| LA        | 50  | 3.029144 | 0.014   | 0.014   |
|           | 70  | 2.330901 | 0.023   | 0.023   |
|           | 142 | 1.09537  | 0.321   | 0.321   |
| RA        | 50  | 1.578709 | 0.12    | 0.12    |
|           | 70  | 2.910362 | 0.013   | 0.013   |
|           | 142 | 2.511789 | 0.039   | 0.039   |
| LV-top    | 50  | 3.652951 | 0.005   | 0.005   |
|           | 70  | 1.460853 | 0.143   | 0.143   |
|           | 142 | 1.187019 | 0.282   | 0.282   |
| LV-bottom | 50  | 5.163818 | 0.003   | 0.003   |
|           | 70  | 3.503573 | 0.002   | 0.002   |
|           | 142 | 4.459738 | 0.001   | 0.001   |
| RV-top    | 50  | 2.060866 | 0.009   | 0.009   |
|           | 70  | 4.613933 | 0.001   | 0.001   |
|           | 142 | 3.914494 | 0.001   | 0.001   |
| RV-bottom | 50  | 1.45523  | 0.139   | 0.139   |
|           | 70  | 4.282155 | 0.001   | 0.001   |
|           | 142 | 5.425939 | 0.001   | 0.001   |

**Table B. Kruskal-Wallis with FDR-corrected post-hoc Dunn's test between naïve and infected at 50, 75, and 142 days post infection (DPI).**

| Heart section | Pair 1                  | Pair 2                   | FDR-corrected P value |
|---------------|-------------------------|--------------------------|-----------------------|
| LA            | naive_VS_infected_50DPI | naive_VS_infected_75DPI  | 3.327069e-01          |
|               | naive_VS_infected_50DPI | naive_VS_infected_142DPI | 2.678613e-18          |
|               | naive_VS_infected_75DPI | naive_VS_infected_142DPI | 6.183185e-22          |
| RA            | naive_VS_infected_50DPI | naive_VS_infected_75DPI  | 0.7474485             |
|               | naive_VS_infected_50DPI | naive_VS_infected_142DPI | 0.7727821             |
|               | naive_VS_infected_75DPI | naive_VS_infected_142DPI | 0.6268322             |
| LVT           | naive_VS_infected_50DPI | naive_VS_infected_75DPI  | 0.007282892           |
|               | naive_VS_infected_50DPI | naive_VS_infected_142DPI | 0.092750387           |
|               | naive_VS_infected_75DPI | naive_VS_infected_142DPI | 0.244127579           |
| LVB           | naive_VS_infected_50DPI | naive_VS_infected_75DPI  | 2.233079e-09          |
|               | naive_VS_infected_50DPI | naive_VS_infected_142DPI | 9.915717e-17          |
|               | naive_VS_infected_75DPI | naive_VS_infected_142DPI | 1.686405e-02          |
| RVT           | naive_VS_infected_50DPI | naive_VS_infected_75DPI  | 0.05464850            |
|               | naive_VS_infected_50DPI | naive_VS_infected_142DPI | 0.40073528            |
|               | naive_VS_infected_75DPI | naive_VS_infected_142DPI | 0.01009132            |
| RVB           | naive_VS_infected_50DPI | naive_VS_infected_75DPI  | 0.2803490             |
|               | naive_VS_infected_50DPI | naive_VS_infected_142DPI | 0.1506789             |
|               | naive_VS_infected_75DPI | naive_VS_infected_142DPI | 0.9722301             |

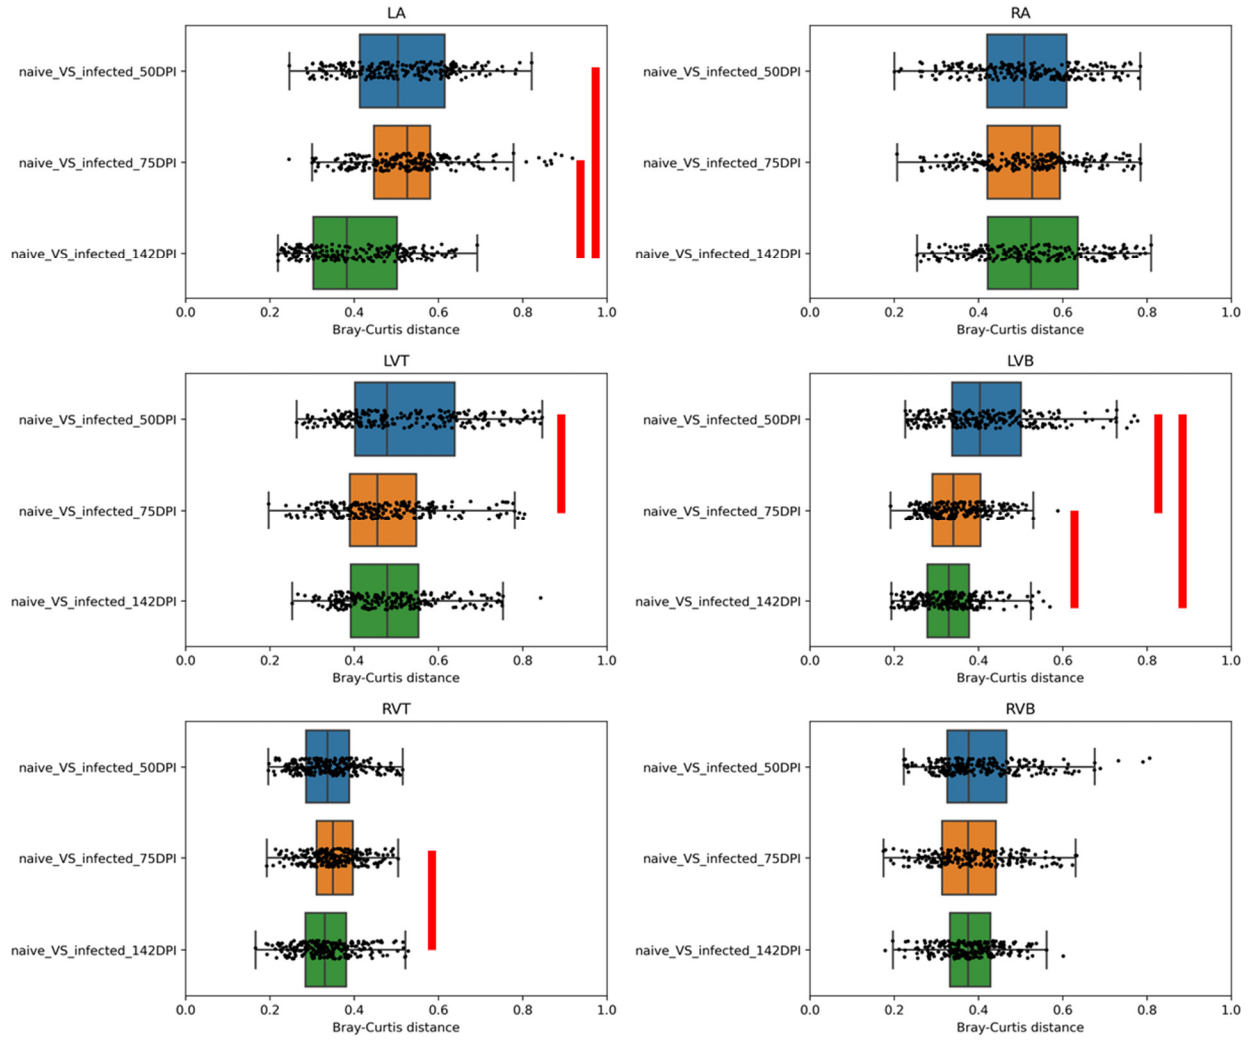

**Figure A. Distance analysis boxplot between naïve and infected at 50, 75, and 142 days post infection (DPI). Red line, p-value <0.05 by Mann-Whitney U Test, FDR-corrected.**

**Table C. Distance analysis between different treatment groups at 142 DPI.**

| Heart section | Group 1  | Group 2  | pseudo-F | p-value |
|---------------|----------|----------|----------|---------|
| LA            | naive    | BNZ      | 1.356518 | 0.219   |
|               | naive    | infected | 1.095370 | 0.292   |
|               | naive    | combo    | 1.359726 | 0.228   |
|               | infected | BNZ      | 0.975107 | 0.379   |
|               | infected | combo    | 0.831580 | 0.459   |
|               | combo    | BNZ      | 0.654794 | 0.647   |
| RA            | naive    | BNZ      | 1.247886 | 0.238   |
|               | naive    | infected | 2.511789 | 0.041   |
|               | naive    | combo    | 1.288730 | 0.235   |
|               | infected | BNZ      | 0.929379 | 0.407   |
|               | infected | combo    | 1.144374 | 0.293   |
|               | combo    | BNZ      | 0.346012 | 0.943   |
| LVT           | naive    | BNZ      | 1.484447 | 0.159   |
|               | naive    | infected | 1.187019 | 0.292   |
|               | naive    | combo    | 1.461685 | 0.166   |
|               | infected | BNZ      | 1.051550 | 0.362   |
|               | infected | combo    | 1.214317 | 0.245   |
|               | combo    | BNZ      | 2.061494 | 0.043   |
| LVB           | naive    | BNZ      | 2.715189 | 0.004   |
|               | naive    | infected | 4.459738 | 0.002   |
|               | naive    | combo    | 3.321633 | 0.001   |
|               | infected | BNZ      | 1.295228 | 0.273   |
|               | infected | combo    | 1.753522 | 0.083   |
|               | combo    | BNZ      | 1.869084 | 0.046   |
| RVT           | naive    | BNZ      | 3.087695 | 0.001   |
|               | naive    | infected | 3.914494 | 0.001   |
|               | naive    | combo    | 2.366988 | 0.012   |
|               | infected | BNZ      | 2.117736 | 0.035   |
|               | infected | combo    | 2.610696 | 0.002   |
|               | combo    | BNZ      | 1.013534 | 0.419   |
| RVB           | naive    | BNZ      | 4.910679 | 0.001   |
|               | naive    | infected | 5.425939 | 0.001   |
|               | naive    | combo    | 3.276360 | 0.001   |
|               | infected | BNZ      | 2.552585 | 0.010   |
|               | infected | combo    | 4.760043 | 0.001   |
|               | combo    | BNZ      | 2.368141 | 0.008   |

**Table D. Kruskal-Wallis with FDR-corrected post-hoc Dunn's test between different treatment groups at 142 DPI.**

|     | Pair 1            | Pair 2            | FDR-corrected p value |
|-----|-------------------|-------------------|-----------------------|
| LA  | naive_VS_BNZ      | naive_VS_naive    | 0.139782138           |
|     | naive_VS_BNZ      | naive_VS_infected | 0.160693030           |
|     | naive_VS_naive    | naive_VS_infected | 0.776120010           |
|     | naive_VS_BNZ      | naive_VS_combo    | 0.179862414           |
|     | naive_VS_naive    | naive_VS_combo    | 0.010418740           |
|     | naive_VS_infected | naive_VS_combo    | 0.005658156           |
| RA  | naive_VS_BNZ      | naive_VS_naive    | 0.1908288             |
|     | naive_VS_BNZ      | naive_VS_infected | 0.1936673             |
|     | naive_VS_naive    | naive_VS_infected | 0.0262561             |
|     | naive_VS_BNZ      | naive_VS_combo    | 0.4614456             |
|     | naive_VS_naive    | naive_VS_combo    | 0.1038900             |
|     | naive_VS_infected | naive_VS_combo    | 0.4266253             |
| LVT | naive_VS_BNZ      | naive_VS_naive    | 0.88251583            |
|     | naive_VS_BNZ      | naive_VS_infected | 0.03130183            |
|     | naive_VS_naive    | naive_VS_infected | 0.05686250            |
|     | naive_VS_BNZ      | naive_VS_combo    | 0.01622882            |
|     | naive_VS_naive    | naive_VS_combo    | 0.03320798            |
|     | naive_VS_infected | naive_VS_combo    | 0.67229235            |
| LVB | naive_VS_BNZ      | naive_VS_naive    | 9.456508e-10          |
|     | naive_VS_BNZ      | naive_VS_infected | 9.802618e-03          |
|     | naive_VS_naive    | naive_VS_infected | 5.412709e-05          |
|     | naive_VS_BNZ      | naive_VS_combo    | 8.212829e-03          |
|     | naive_VS_naive    | naive_VS_combo    | 5.778669e-05          |
|     | naive_VS_infected | naive_VS_combo    | 8.944717e-01          |
| RVT | naive_VS_BNZ      | naive_VS_naive    | 1.523759e-04          |
|     | naive_VS_BNZ      | naive_VS_infected | 1.761728e-01          |
|     | naive_VS_naive    | naive_VS_infected | 1.729419e-06          |
|     | naive_VS_BNZ      | naive_VS_combo    | 1.527634e-01          |
|     | naive_VS_naive    | naive_VS_combo    | 6.861743e-03          |
|     | naive_VS_infected | naive_VS_combo    | 8.017866e-03          |
| RVB | naive_VS_BNZ      | naive_VS_naive    | 8.521031e-01          |
|     | naive_VS_BNZ      | naive_VS_infected | 1.436145e-07          |
|     | naive_VS_naive    | naive_VS_infected | 2.818214e-06          |
|     | naive_VS_BNZ      | naive_VS_combo    | 7.745506e-01          |
|     | naive_VS_naive    | naive_VS_combo    | 8.225285e-01          |
|     | naive_VS_infected | naive_VS_combo    | 3.581962e-07          |

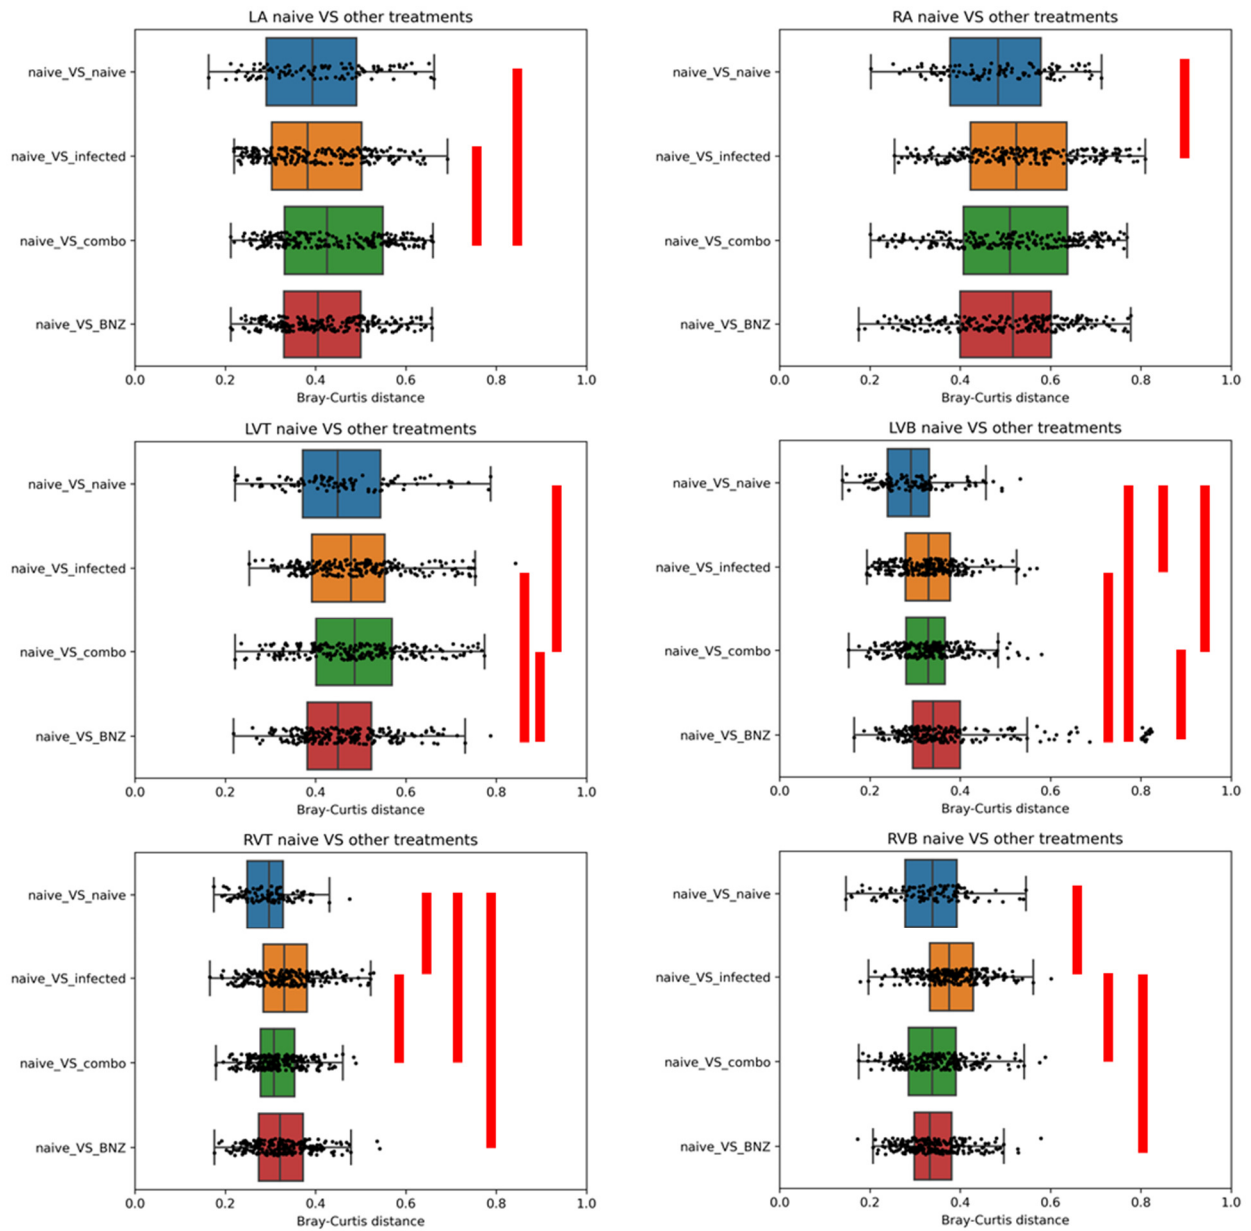

**Figure B. Distance analysis boxplot between naïve groups and other experimental groups at 142DPI.**  
 Red line, p-value < 0.05 by Mann-Whitney U Test, FDR-corrected.

**Table E. Kruskal-Wallis with FDR-corrected post-hoc Dunn's test between infected no treatment group and other treatment groups at 142 DPI.**

| Heart section | Pair 1               | Pair 2               | FDR-corrected p value |
|---------------|----------------------|----------------------|-----------------------|
| LA            | infected_VS_BNZ      | infected_VS_infected | 0.4411514             |
|               | infected_VS_BNZ      | infected_VS_combo    | 0.1796762             |
|               | infected_VS_infected | infected_VS_combo    | 0.1328960             |
| RA            | infected_VS_BNZ      | infected_VS_infected | 0.7325454             |
|               | infected_VS_BNZ      | infected_VS_combo    | 0.8818900             |
|               | infected_VS_infected | infected_VS_combo    | 0.9304309             |
| LVT           | infected_VS_BNZ      | infected_VS_infected | 0.11787664            |
|               | infected_VS_BNZ      | infected_VS_combo    | 0.01237103            |
|               | infected_VS_infected | infected_VS_combo    | 0.59656541            |
| LVB           | infected_VS_BNZ      | infected_VS_infected | 0.01219156            |
|               | infected_VS_BNZ      | infected_VS_combo    | 0.62243881            |
|               | infected_VS_infected | infected_VS_combo    | 0.01968717            |
| RVT           | infected_VS_BNZ      | infected_VS_infected | 0.3474791             |
|               | infected_VS_BNZ      | infected_VS_combo    | 0.8204677             |
|               | infected_VS_infected | infected_VS_combo    | 0.5053970             |
| RVB           | infected_VS_BNZ      | infected_VS_infected | 1.123535e-01          |
|               | infected_VS_BNZ      | infected_VS_combo    | 7.433810e-08          |
|               | infected_VS_infected | infected_VS_combo    | 6.365436e-03          |

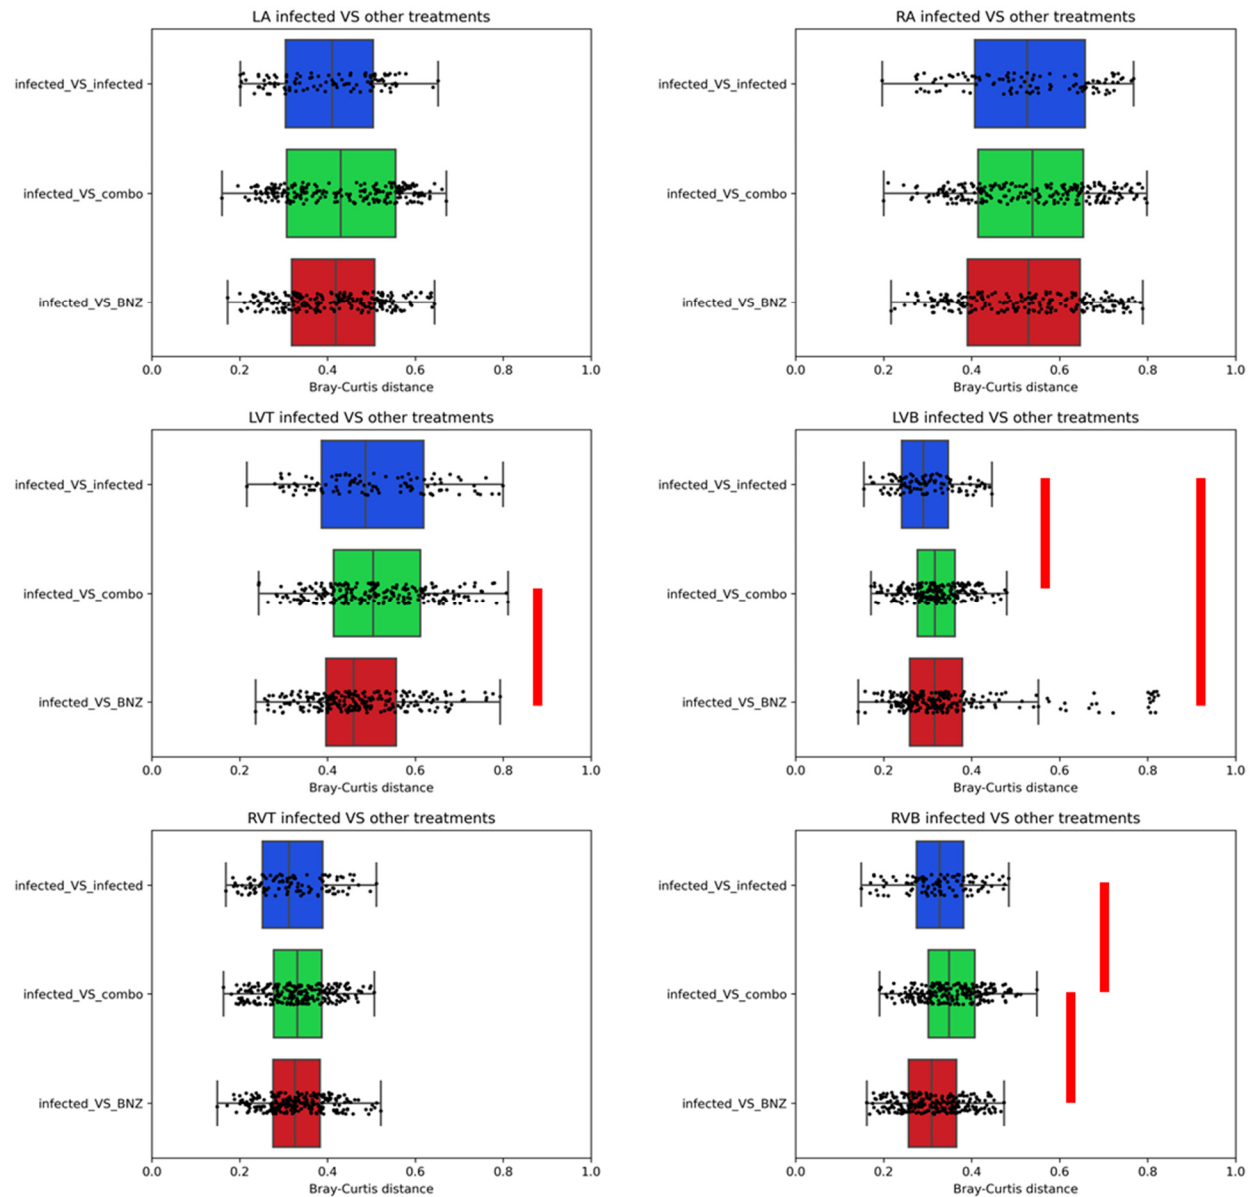

**Figure C. Distance analysis boxplots between infected no treatment group and other treatment groups at 142 DPI. Red line, p-value <0.05 by Mann-Whitney U Test, FDR-corrected.**



**Table F. Distance analysis between different treatment groups at 142 DPI without high parasite burden post-BNZ treatment outlier mouse.**

| Heart section | Group 1  | Group 2  | pseudo-F | p-value |
|---------------|----------|----------|----------|---------|
| LA            | naive    | BNZ      | 1.325617 | 0.232   |
|               | naive    | infected | 1.09537  | 0.31    |
|               | naive    | combo    | 1.359726 | 0.222   |
|               | infected | BNZ      | 0.894473 | 0.443   |
|               | infected | combo    | 0.83158  | 0.484   |
|               | combo    | BNZ      | 0.769384 | 0.543   |
| RA            | naive    | BNZ      | 1.406805 | 0.186   |
|               | naive    | infected | 2.511789 | 0.044   |
|               | naive    | combo    | 1.28873  | 0.214   |
|               | infected | BNZ      | 0.7668   | 0.522   |
|               | infected | combo    | 1.144374 | 0.279   |
|               | combo    | BNZ      | 0.457876 | 0.852   |
| LVT           | naive    | BNZ      | 1.949067 | 0.054   |
|               | naive    | infected | 1.187019 | 0.277   |
|               | naive    | combo    | 1.461685 | 0.173   |
|               | infected | BNZ      | 1.384779 | 0.182   |
|               | infected | combo    | 1.214317 | 0.265   |
|               | combo    | BNZ      | 2.323148 | 0.026   |
| LVB           | naive    | BNZ      | 2.845178 | 0.001   |
|               | naive    | infected | 4.459738 | 0.001   |
|               | naive    | combo    | 3.321633 | 0.001   |
|               | infected | BNZ      | 1.295049 | 0.279   |
|               | infected | combo    | 1.753522 | 0.078   |
|               | combo    | BNZ      | 2.067337 | 0.031   |
| RVT           | naive    | BNZ      | 3.638358 | 0.002   |
|               | naive    | infected | 3.914494 | 0.001   |
|               | naive    | combo    | 2.366988 | 0.008   |
|               | infected | BNZ      | 2.032209 | 0.046   |
|               | infected | combo    | 2.610696 | 0.002   |
|               | combo    | BNZ      | 1.295884 | 0.224   |
| RVB           | naive    | BNZ      | 5.356061 | 0.001   |
|               | naive    | infected | 5.425939 | 0.001   |
|               | naive    | combo    | 3.27636  | 0.004   |
|               | infected | BNZ      | 2.336337 | 0.018   |
|               | infected | combo    | 4.760043 | 0.001   |
|               | combo    | BNZ      | 2.566525 | 0.004   |

**Table G. Kruskal-Wallis with FDR-corrected post-hoc Dunn's test between different treatment groups at 142 DPI without high parasite burden post-BNZ treatment outlier mouse.**

|     | Pair1             | Pair2             | FDR-corrected p value |
|-----|-------------------|-------------------|-----------------------|
| LA  | naive_VS_BNZ      | naive_VS_naive    | 0.295489565           |
|     | naive_VS_BNZ      | naive_VS_infected | 0.251628525           |
|     | naive_VS_naive    | naive_VS_infected | 0.774607473           |
|     | naive_VS_BNZ      | naive_VS_combo    | 0.095755447           |
|     | naive_VS_naive    | naive_VS_combo    | 0.010810319           |
|     | naive_VS_infected | naive_VS_combo    | 0.006009265           |
| RA  | naive_VS_BNZ      | naive_VS_naive    | 0.20069214            |
|     | naive_VS_BNZ      | naive_VS_infected | 0.20583003            |
|     | naive_VS_naive    | naive_VS_infected | 0.02704533            |
|     | naive_VS_BNZ      | naive_VS_combo    | 0.47119782            |
|     | naive_VS_naive    | naive_VS_combo    | 0.10686888            |
|     | naive_VS_infected | naive_VS_combo    | 0.42504515            |
| LVT | naive_VS_BNZ      | naive_VS_naive    | 0.788488612           |
|     | naive_VS_BNZ      | naive_VS_infected | 0.011706694           |
|     | naive_VS_naive    | naive_VS_infected | 0.057448034           |
|     | naive_VS_BNZ      | naive_VS_combo    | 0.003267821           |
|     | naive_VS_naive    | naive_VS_combo    | 0.022433229           |
|     | naive_VS_infected | naive_VS_combo    | 0.672722645           |
| LVB | naive_VS_BNZ      | naive_VS_naive    | 2.406726e-09          |
|     | naive_VS_BNZ      | naive_VS_infected | 1.397022e-02          |
|     | naive_VS_naive    | naive_VS_infected | 5.705367e-05          |
|     | naive_VS_BNZ      | naive_VS_combo    | 1.221490e-02          |
|     | naive_VS_naive    | naive_VS_combo    | 5.932090e-05          |
|     | naive_VS_infected | naive_VS_combo    | 9.001797e-01          |
| RVT | naive_VS_BNZ      | naive_VS_naive    | 2.671548e-04          |
|     | naive_VS_BNZ      | naive_VS_infected | 1.818625e-01          |
|     | naive_VS_naive    | naive_VS_infected | 1.764897e-06          |
|     | naive_VS_BNZ      | naive_VS_combo    | 1.660460e-01          |
|     | naive_VS_naive    | naive_VS_combo    | 6.799045e-03          |
|     | naive_VS_infected | naive_VS_combo    | 8.235658e-03          |
| RVB | naive_VS_BNZ      | naive_VS_naive    | 6.714309e-01          |
|     | naive_VS_BNZ      | naive_VS_infected | 1.777988e-06          |
|     | naive_VS_naive    | naive_VS_infected | 2.842693e-06          |
|     | naive_VS_BNZ      | naive_VS_combo    | 8.226742e-01          |
|     | naive_VS_naive    | naive_VS_combo    | 6.694273e-01          |
|     | naive_VS_infected | naive_VS_combo    | 6.575513e-07          |

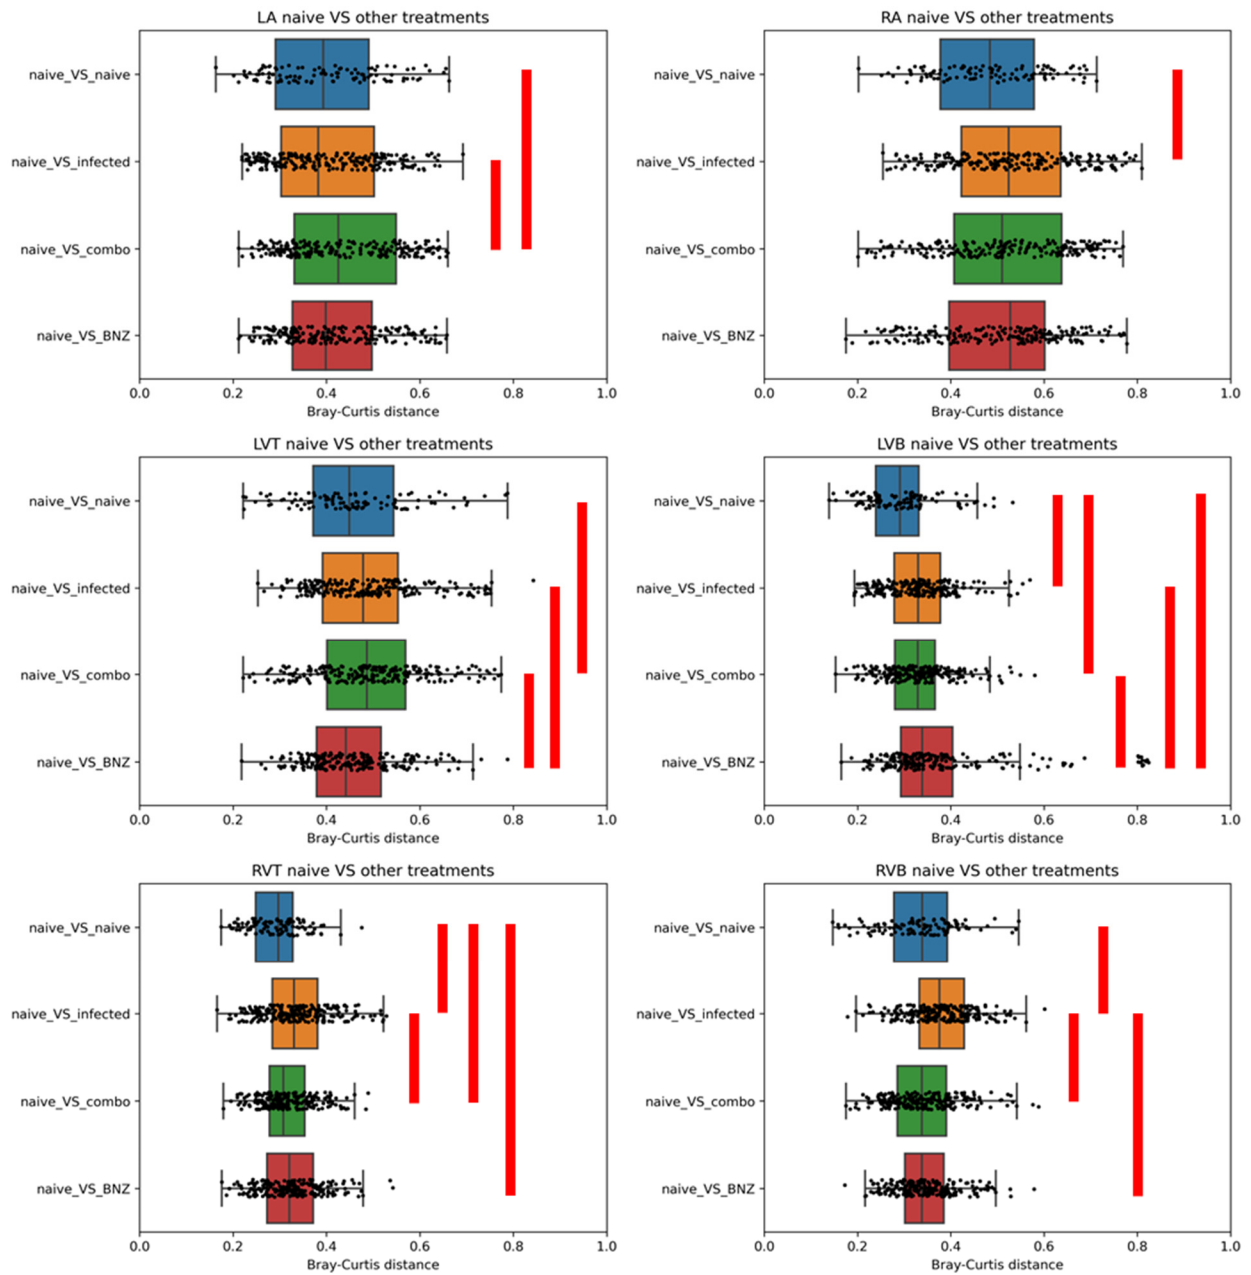

**Figure D. Distance analysis boxplot between naïve groups and other experimental groups at 142DPI without high parasite burden post-BNZ treatment outlier mouse. Red line, p-value <0.05 by Mann-Whitney U Test, FDR-corrected.**

**Table H. Kruskal-Wallis with FDR-corrected post-hoc Dunn's test between infected no treatment group and other treatment groups at 142 DPI without high parasite burden post-BNZ treatment outlier mouse.**

| Heart section | Pair1                | Pair2                | FDR-corrected p value |
|---------------|----------------------|----------------------|-----------------------|
| LA            | infected_VS_BNZ      | infected_VS_infected | 0.63264802            |
|               | infected_VS_BNZ      | infected_VS_combo    | 0.09687013            |
|               | infected_VS_infected | infected_VS_combo    | 0.14182864            |
| RA            | infected_VS_BNZ      | infected_VS_infected | 0.7682509             |
|               | infected_VS_BNZ      | infected_VS_combo    | 0.4544656             |
|               | infected_VS_infected | infected_VS_combo    | 0.6159846             |
| LVT           | infected_VS_BNZ      | infected_VS_infected | 0.060225950           |
|               | infected_VS_BNZ      | infected_VS_combo    | 0.003792884           |
|               | infected_VS_infected | infected_VS_combo    | 0.587838689           |
| LVB           | infected_VS_BNZ      | infected_VS_infected | 0.02481829            |
|               | infected_VS_BNZ      | infected_VS_combo    | 0.91364429            |
|               | infected_VS_infected | infected_VS_combo    | 0.03603772            |
| RVT           | infected_VS_BNZ      | infected_VS_infected | 0.5520473             |
|               | infected_VS_BNZ      | infected_VS_combo    | 0.4810231             |
|               | infected_VS_infected | infected_VS_combo    | 0.4777285             |
| RVB           | infected_VS_BNZ      | infected_VS_infected | 4.311688e-02          |
|               | infected_VS_BNZ      | infected_VS_combo    | 4.854801e-09          |
|               | infected_VS_infected | infected_VS_combo    | 6.522770e-03          |

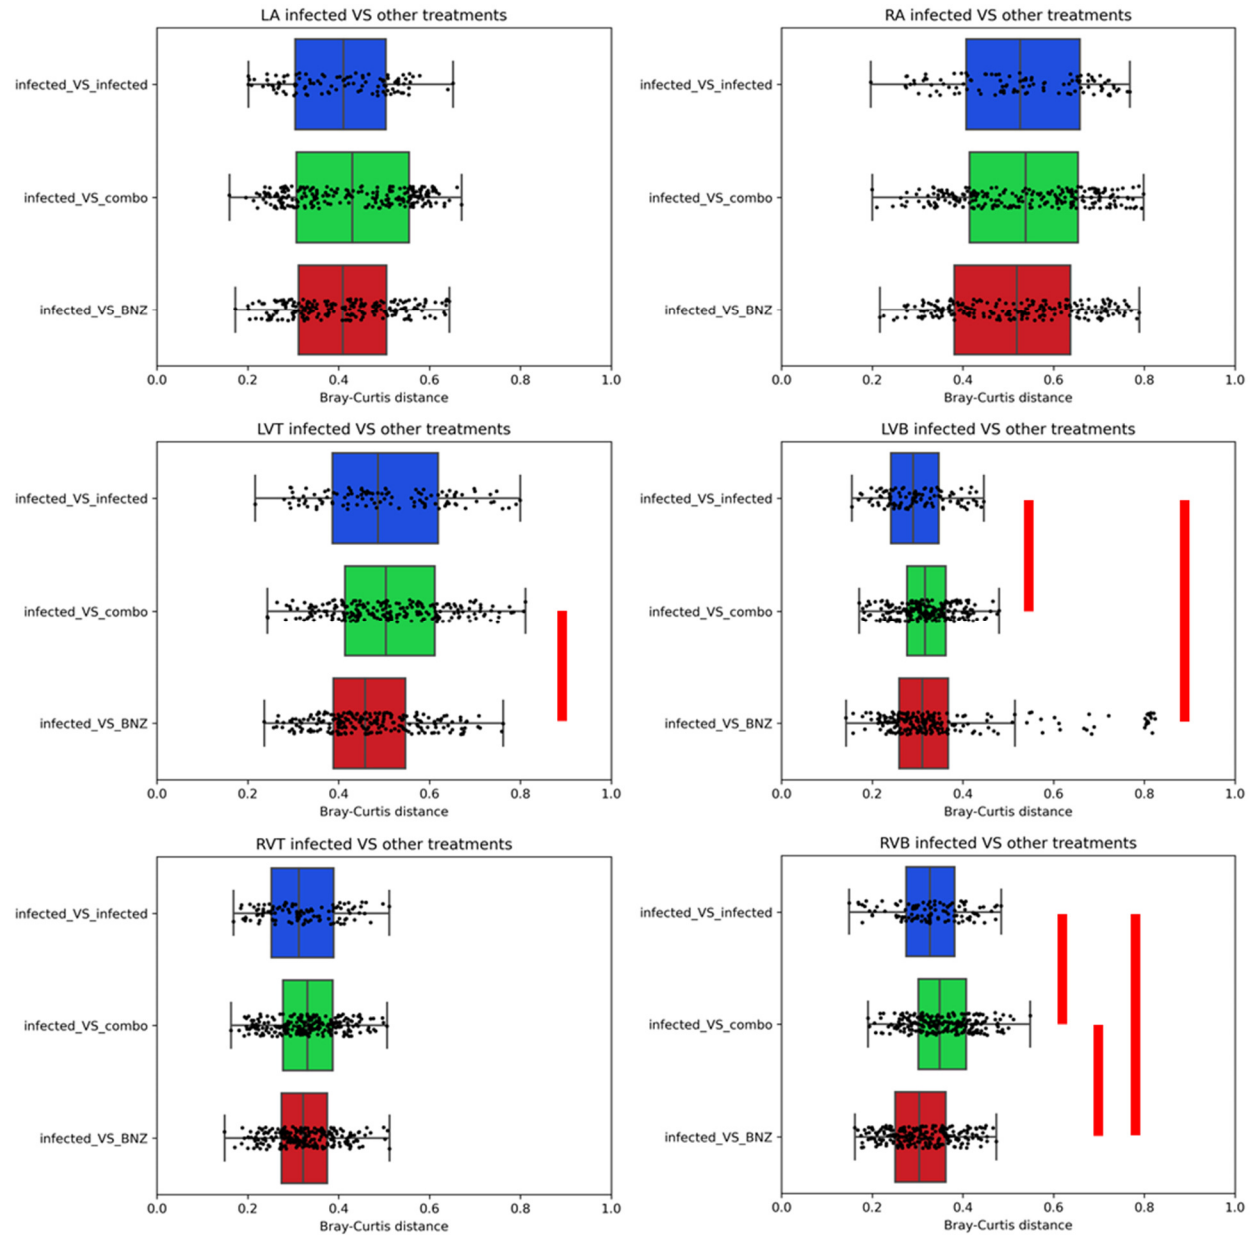

**Figure E. Distance analysis boxplots between infected no treatment group and other treatment groups at 142DPI without high parasite burden post-BNZ treatment outlier mouse. Red line, p-value < 0.05 by Mann-Whitney U Test, FDR-corrected.**
